# Supplementary material
Source: bioRxiv or medRxiv preprint supplement (https://www.biorxiv.org/highwire/filestream/51272/field_highwire_adjunct_files/0/112110-1.pdf)
Supplement: Supplementary file [file 112110-1.pdf]

Supplementary Materials

## **A microfluidic biodisplay**

Francesca Volpetti<sup>1</sup>, Ekaterina Petrova<sup>1</sup>, & Sebastian J. Maerkl\*

<sup>1</sup>these authors contributed equally

Institute of Bioengineering, School of Engineering, Ecole Polytechnique Federale de Lausanne

\*Correspondence should be addressed to SJM ([sebastian.maerkl@epfl.ch](mailto:sebastian.maerkl@epfl.ch))

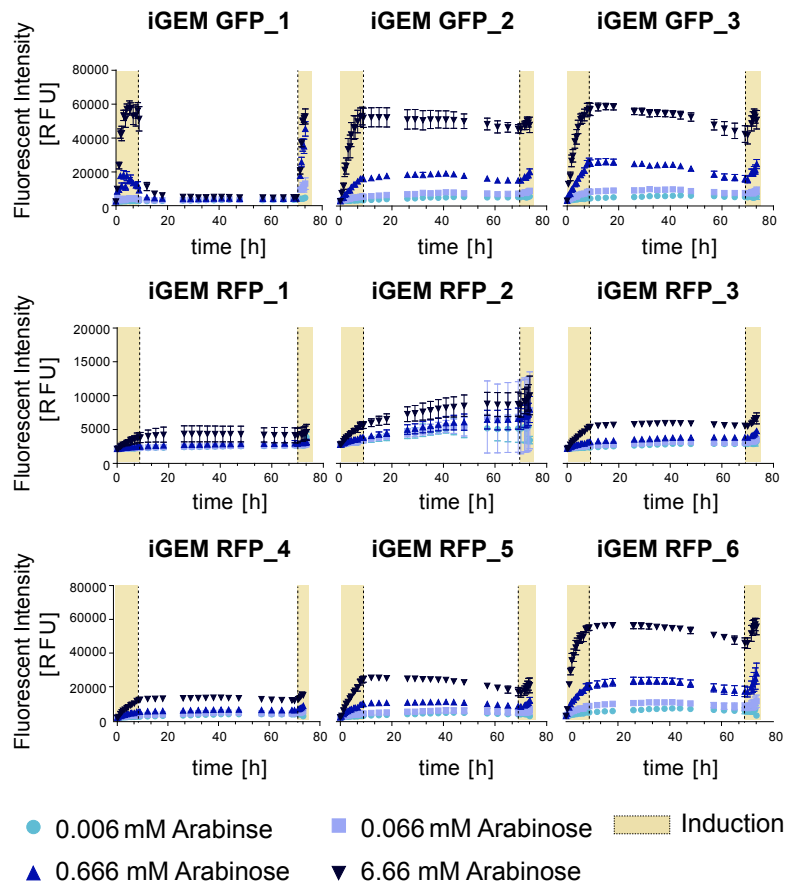

**Figure S1.** Biodisplay for strain characterization at 37°C. Fluorescent intensity of GFP or RFP expression of nine different arabinose sensitive *E. coli* strains. The cells were induced twice with 4 different concentrations of arabinose (0.006 mM, 0.066 mM, 0.666 mM and 6.66 mM). The yellow background indicates the induction intervals. The microfluidic chip was heated to 37°C during the experiment.

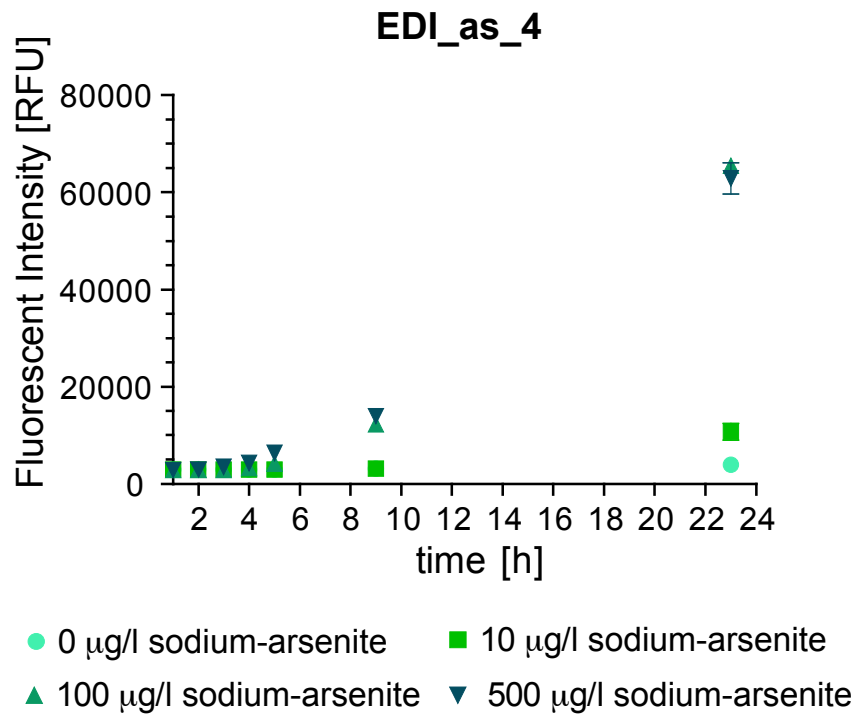

**Figure S2.** Arsenic-responsive *E. coli*, EDI\_as\_4, was spotted on the chip and 4 different concentrations of sodium-arsenite in LB were sampled for 24 hours. GFP expression was monitored over time using an epifluorescent microscope.

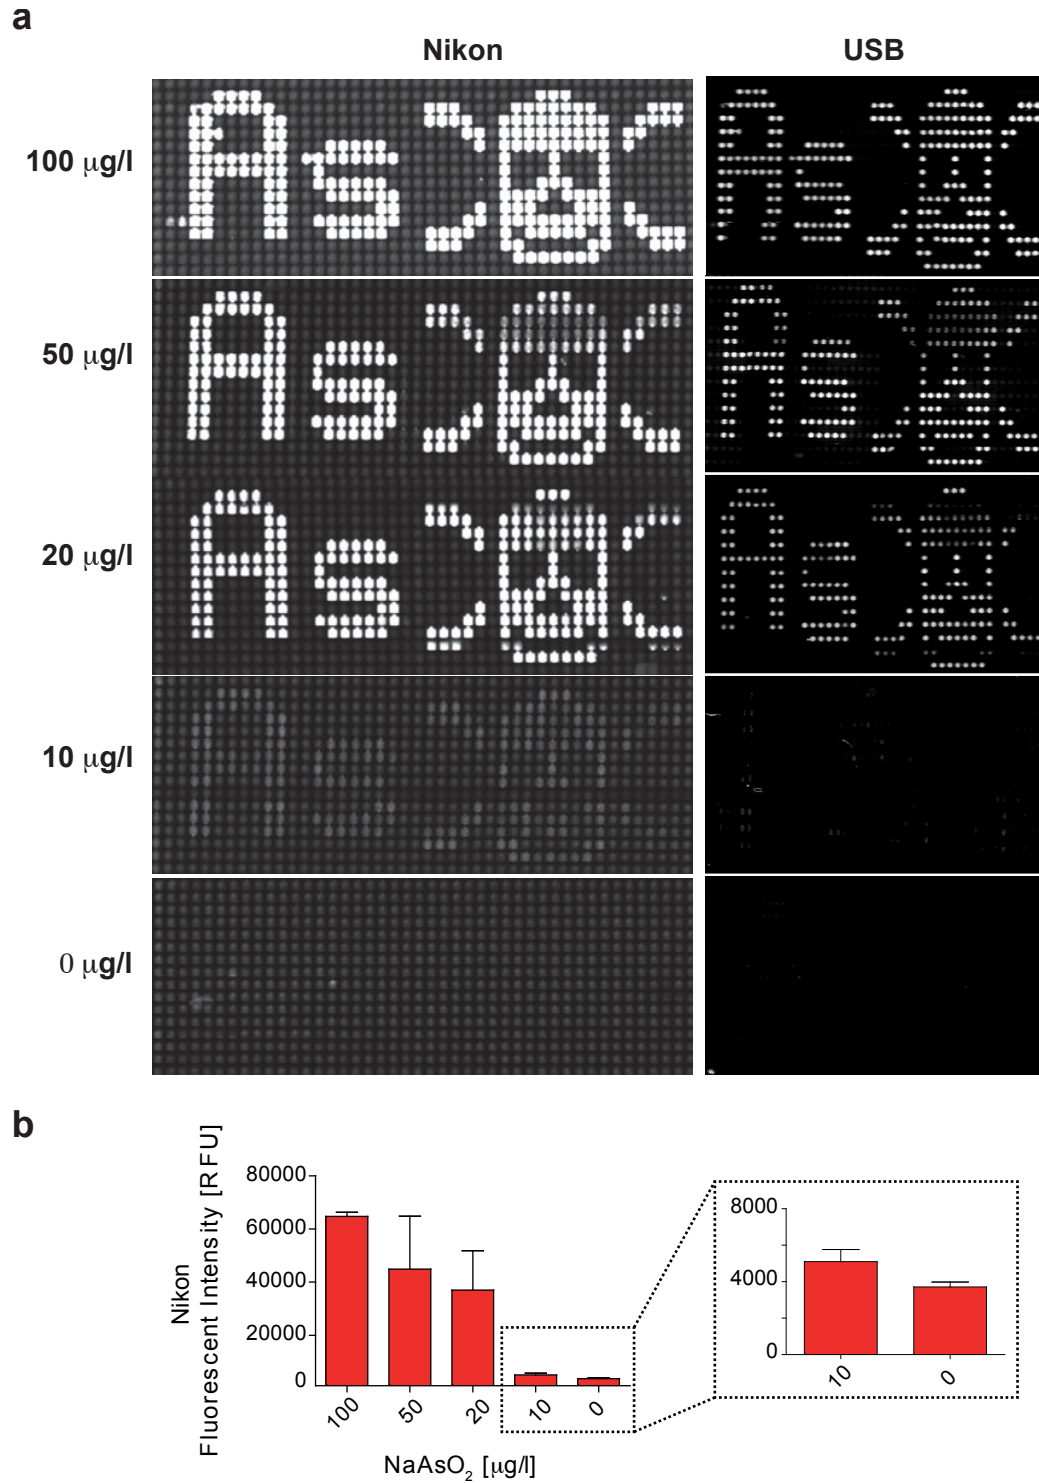

**Figure S3.** Arsenic biodisplay. **(a)** Fluorescent images taken using an epifluorescent and USB microscope after 24 hours of induction with different concentrations of sodium-arsenite (100  $\mu\text{g/l}$ , 50  $\mu\text{g/l}$ , 20  $\mu\text{g/l}$ , 10  $\mu\text{g/l}$  and 0  $\mu\text{g/l}$ ). Each concentration was sampled in different devices. **(b)** Quantitation of the fluorescent signal, after 24 hours of induction and measured with the epifluorescent microscope.

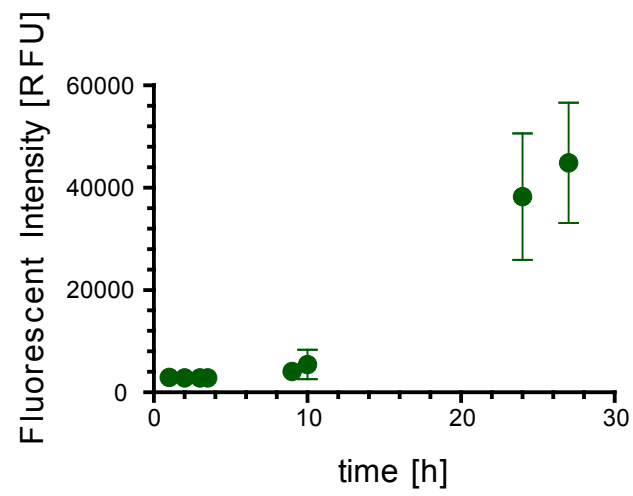

**Figure S4.** Arsenic biodisplay. Arsenic-responsive *E. coli* was spotted in a “As” and a “skull and crossbones” pattern. 20  $\mu\text{g/l}$  of sodium-arsenite in tap water was sampled and GFP expression monitored over time using an epifluorescent microscope.

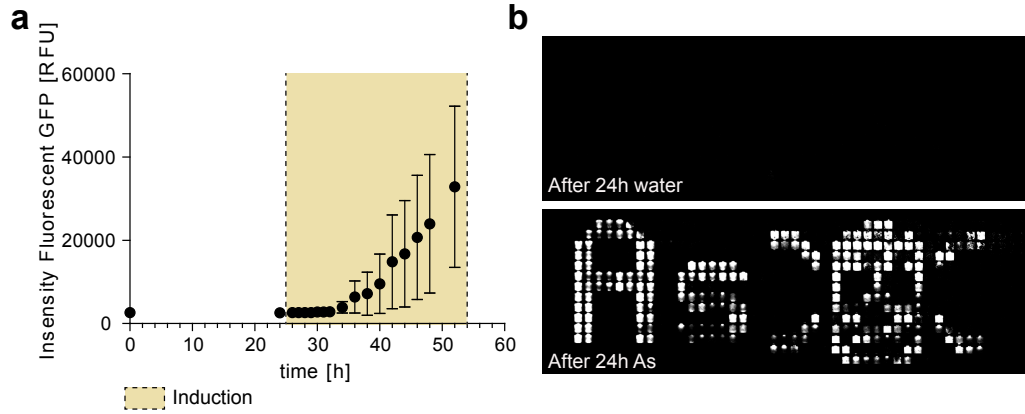

**Figure S5.** Delayed arsenite sampling. a) Arsenic-responsive *E. coli* was spotted in a “As” and a “skull and crossbones” pattern. After sampling water for 24 hours, water containing 50  $\mu\text{g/l}$  of sodium-arsenite was sampled. The GFP signal was monitored using an epifluorescent microscope. b) Fluorescent images of the device after 24 hours of water sampling (top) and others 24 hours of water containing sodium-arsenite.

**a**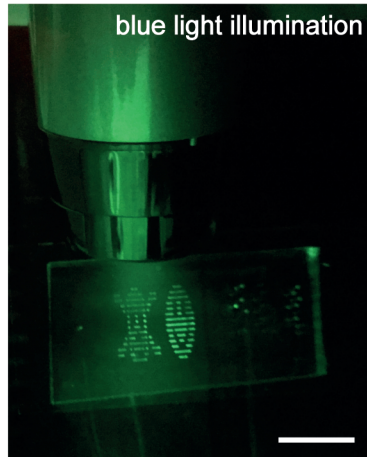**b**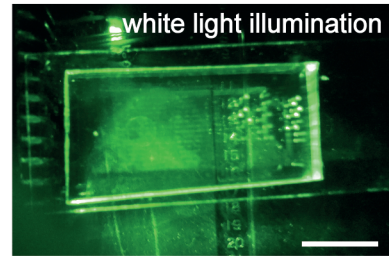

**Figure S6.** Cellphone image acquisition. **(a)** The microfluidic chip was illuminated using the LEDs of a USB microscope (excitation at 480 nm), a band-pass filter centered at 530nm with a 40 nm bandwidth was placed in front of the camera of the cellphone. **(b)** The same device was illuminated by white light and imaged using the cellphone and emission filter as in **(a)**. Scale bar 1cm.

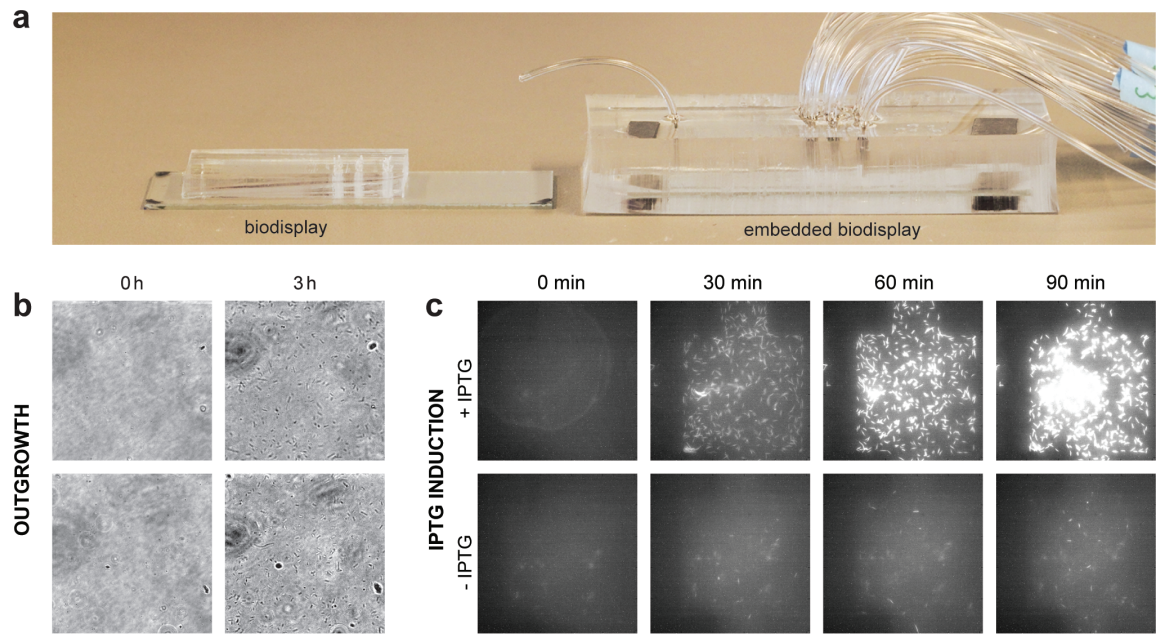

**Figure S7.** Embedded spore biodisplay. **(a)** Photo comparing the spore biodisplay and the embedded PDMS spore biodisplay. **(b)** Bright-field images of magnified center part of spotted chambers showing spore germination. Images are acquired immediately after spot resuspension with medium and 3 hours incubation at 37°C. **(c)** Time-lapse images of germinated *Phy-spank-mCherry B. subtilis* spores after induction with 1  $\mu$ M IPTG.



| Identifier                     | Name       | Host Strain                   | Resistance      | Inducer   | Reporter |
|--------------------------------|------------|-------------------------------|-----------------|-----------|----------|
| BBa_I13517                     | iGEM RFP_1 | <i>E.coli</i><br>DH5 $\alpha$ | Chloramphenicol | Arabinose | RFP      |
| BBa_K1333301                   | iGEM RFP_2 | <i>E.coli</i><br>DH5 $\alpha$ | Chloramphenicol | Arabinose | RFP      |
| BBa_K1333300                   | iGEM RFP_3 | <i>E.coli</i><br>DH5 $\alpha$ | Chloramphenicol | Arabinose | RFP      |
| BBa_K577004                    | iGEM RFP_4 | <i>E.coli</i><br>DH5 $\alpha$ | Chloramphenicol | Arabinose | RFP      |
| BBa_K577882                    | iGEM RFP_5 | <i>E.coli</i><br>DH5 $\alpha$ | Chloramphenicol | Arabinose | RFP      |
| BBa_I13516                     | iGEM RFP_6 | <i>E.coli</i><br>DH5 $\alpha$ | Chloramphenicol | Arabinose | RFP      |
| BBa_K750000                    | iGEM GFP_1 | <i>E.coli</i><br>DH5 $\alpha$ | Chloramphenicol | Arabinose | GFP      |
| BBa_K584000                    | iGEM GFP_2 | <i>E.coli</i><br>DH5 $\alpha$ | Chloramphenicol | Arabinose | GFP      |
| BBa_K577881                    | iGEM GFP_3 | <i>E.coli</i><br>DH5 $\alpha$ | Chloramphenicol | Arabinose | GFP      |
| pBW101ParsR-gfp<br>(78636)     | EDI_as_1   | <i>E.coli</i><br>DH5 $\alpha$ | Kanamycin       | Arsenic   | GFP      |
| pBW102ParsR-<br>Amp32C (78637) | EDI_as_2   | <i>E.coli</i><br>DH5 $\alpha$ | Kanamycin       | Arsenic   | GFP      |
| pBW103ParsR-<br>Amp30C (78638) | EDI_as_3   | <i>E.coli</i><br>DH5 $\alpha$ | Kanamycin       | Arsenic   | GFP      |
| pBW300ParsR-<br>Amp32T (78652) | EDI_as_4   | <i>E.coli</i><br>DH5 $\alpha$ | Kanamycin       | Arsenic   | GFP      |
| pIIUN gfp                      | UNIL_1     | <i>E.coli</i><br>DH5 $\alpha$ | Kanamycin       | Arsenic   | GFP      |
| pAAUN gfp                      | UNIL_2     | <i>E.coli</i><br>DH5 $\alpha$ | Kanamycin       | Arsenic   | GFP      |
| pVUN gfp                       | UNIL_3     | <i>E.coli</i><br>DH5 $\alpha$ | Kanamycin       | Arsenic   | GFP      |

|                  |                                                                    |                                                 |           |         |         |
|------------------|--------------------------------------------------------------------|-------------------------------------------------|-----------|---------|---------|
| pLtet0UN gfp     | UNIL_4                                                             | <i>E.coli</i><br>DH5 $\alpha$                   | Kanamycin | Arsenic | GFP     |
| pPR arsR abs gfp | UNIL_5                                                             | <i>E.coli</i><br>DH5 $\alpha$                   | Kanamycin | Arsenic | GFP     |
| BGSC 3A40        | Bacillus subtilis subsp.<br>Subtilis<br>amyE::Physpank-<br>mCherry | <i>B. subtilis</i><br>subsp.<br><i>subtilis</i> |           | IPTG    | mCherry |
| BGSC 3A39        | Bacillus subtilis subsp.<br>Subtilis<br>amyE::Physpank-GFP         | <i>B. subtilis</i><br>subsp.<br><i>subtilis</i> |           | IPTG    | GFP     |

**Table S1.** List of plasmids and strains used in this work.
